# Supplementary material
Source: Springer Nature journal article supplement (https://www.springermedizin.de/resource/supplementary/12885_2008_1517_MOESM7_ESM.pdf/9472220)

**A**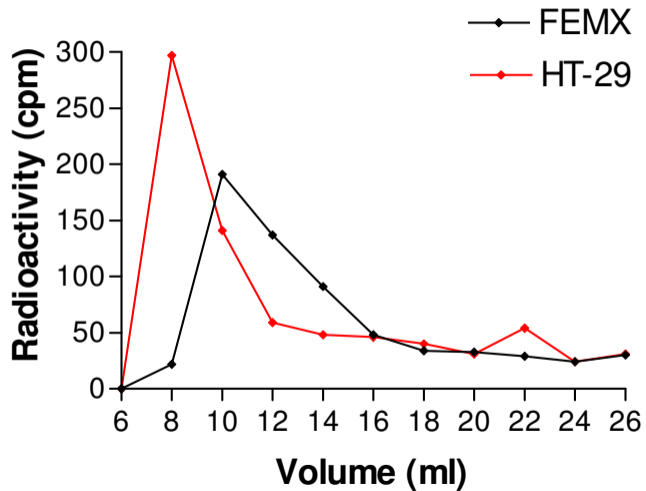**B**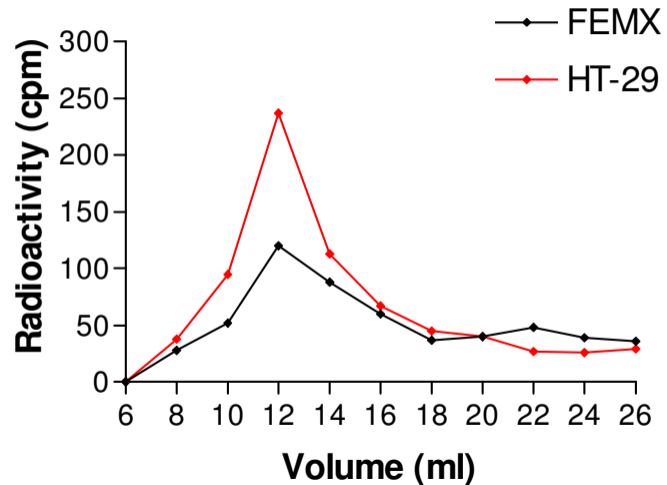

Supplement: MOESM7 [file 9472220]
